# Supplementary material for: Eu- and Tb-adsorbed Si 3 N 4 and Ge 3 N 4 : tuning the colours with one luminescent host
Source: Royal Society of Chemistry journal article supplement (doi:10.1039/d2ra04663f), 2022-01-01
Supplement: d2ra04663f1.pdf [file d2ra04663f1.pdf]

# Supplement revised

## Eu- and Tb-adsorbed Si<sub>3</sub>N<sub>4</sub> and Ge<sub>3</sub>N<sub>4</sub>: Tuning the colours with one luminescent host

Cordula Braun,<sup>[a]\*</sup> Liuda Mereacre,<sup>[a]</sup> Zheng Chen,<sup>[b]</sup> Adam Slabon,<sup>[c]</sup>  
David Vincent,<sup>[d]</sup> Xavier Rocquefelte,<sup>[d]</sup> and Jean-François Halet<sup>[e]</sup>

[a] \* Dr. C. Braun, L. Mereacre,  
Karlsruhe Institute of Technology (KIT)  
Institute for Applied Materials  
Herrmann-von-Helmholtz-Platz 1,  
D-76344 Eggenstein-Leopoldshafen  
E-mail: [Cordula.Braun@kit.edu](mailto:Cordula.Braun@kit.edu)

[b] Z. Chen,  
Institute of Inorganic Chemistry, RWTH Aachen University,  
Landoltweg 1,  
D-52056 Aachen

[c] Prof. Dr. A. Slabon,  
Chair of Inorganic Chemistry,  
University of Wuppertal  
Gaussstr. 20  
42119 Wuppertal, Germany

[d] D. Vincent, Prof. Dr. X. Rocquefelte,  
Univ. Rennes - CNRS  
Institut des Sciences Chimiques de Rennes, UMR 6226  
35000 Rennes, France

[e] Prof. Dr. J.-F. Halet  
CNRS – Saint-Gobain – NIMS, IRL 3629,  
Laboratory for Innovative Key Materials and Structures (LINK),  
National Institute for Materials Science (NIMS),  
1-1 Namiki, Tsukuba 305-0044, Japan

Figure(s)

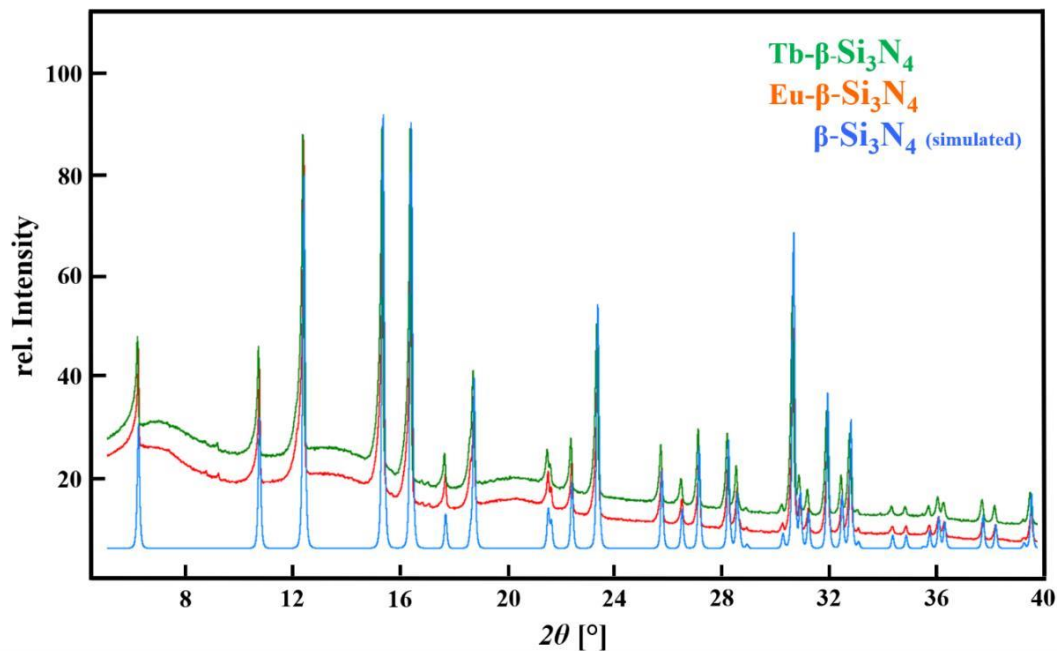

Figure S1: X-ray powder diffraction pattern of Eu- $\beta$ -Si<sub>3</sub>N<sub>4</sub> (red) and Tb- $\beta$ -Si<sub>3</sub>N<sub>4</sub> (green),  $\beta$ -Si<sub>3</sub>N<sub>4</sub> simulated from ICSD 170006 (light blue), ( $\lambda = 0.709026 \text{ \AA}$ ).

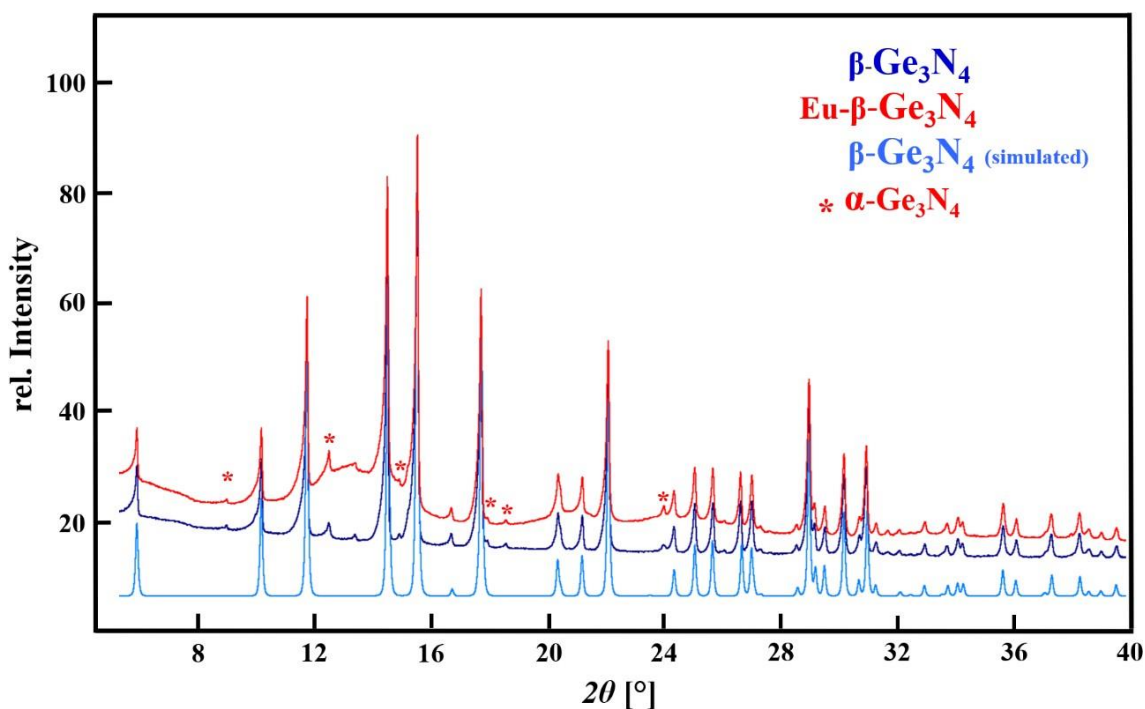

Figure S2: X-ray powder diffraction pattern of pure  $\beta$ -Ge<sub>3</sub>N<sub>4</sub> (blue), Eu- $\beta$ -Ge<sub>3</sub>N<sub>4</sub> (red),  $\beta$ -Ge<sub>3</sub>N<sub>4</sub> simulated from ICSD 658934 (light blue), \* marks  $\alpha$ -Ge<sub>3</sub>N<sub>4</sub> ( $\lambda = 0.709026 \text{ \AA}$ ).

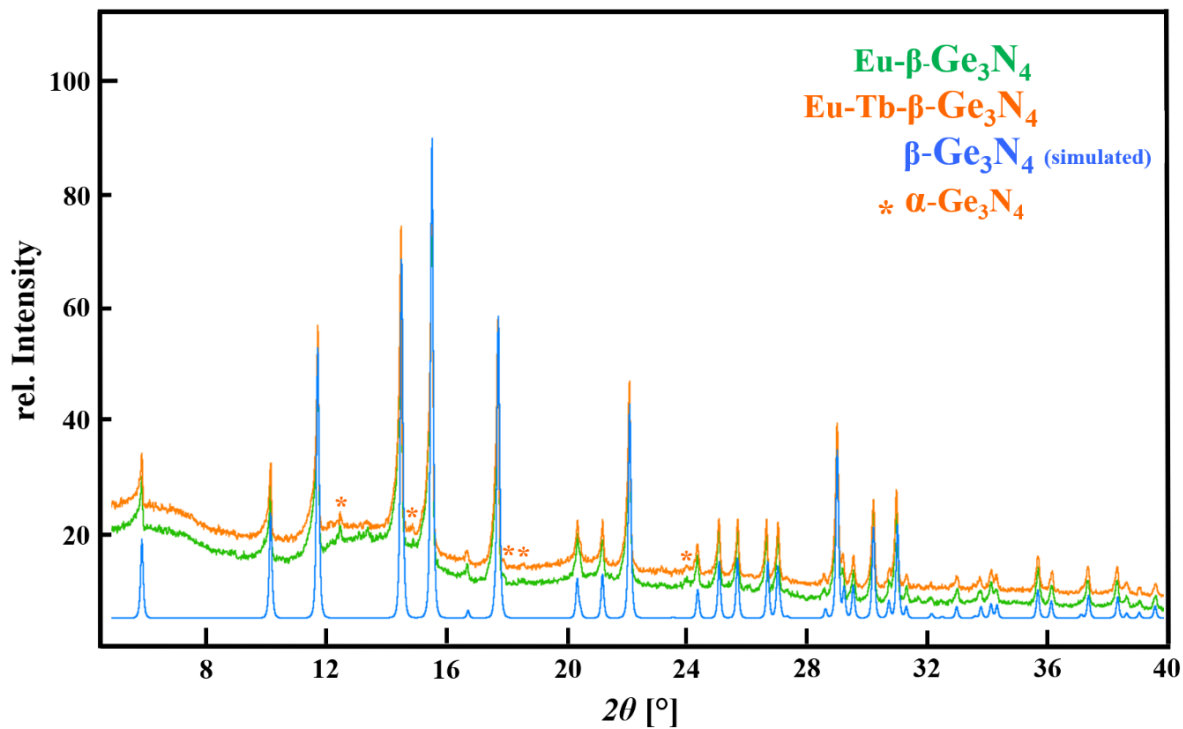

Figure S3: X-ray powder diffraction pattern of Tb- $\beta$ - $\text{Ge}_3\text{N}_4$  (green), Eu,Tb- $\beta$ - $\text{Ge}_3\text{N}_4$  (orange),  $\beta$ - $\text{Ge}_3\text{N}_4$  simulated from ICSD 658934 (light blue), \* marks  $\alpha$ - $\text{Ge}_3\text{N}_4$  ( $\lambda = 0.709026 \text{ \AA}$ ).

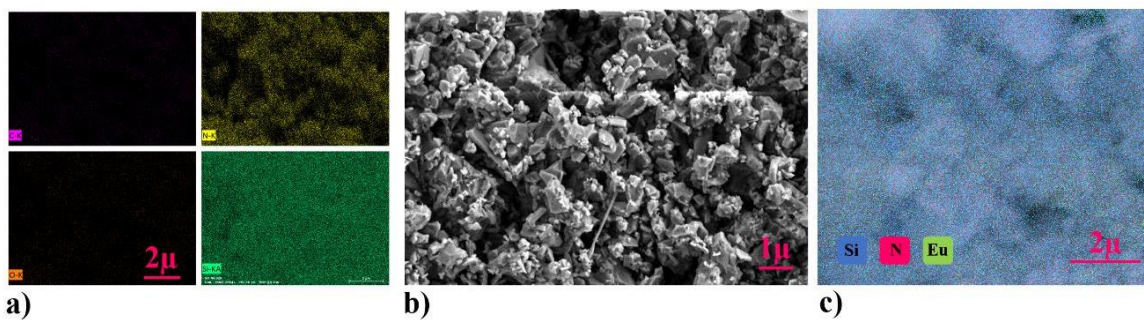

Figure S4: a) REM-EDX of pure  $\beta$ - $\text{Si}_3\text{N}_4$ , b) SEM of pure  $\beta$ - $\text{Si}_3\text{N}_4$ , c) REM-EDX of Eu- $\beta$ - $\text{Si}_3\text{N}_4$  distribution of Si (blue), N (pink) and Eu (green).

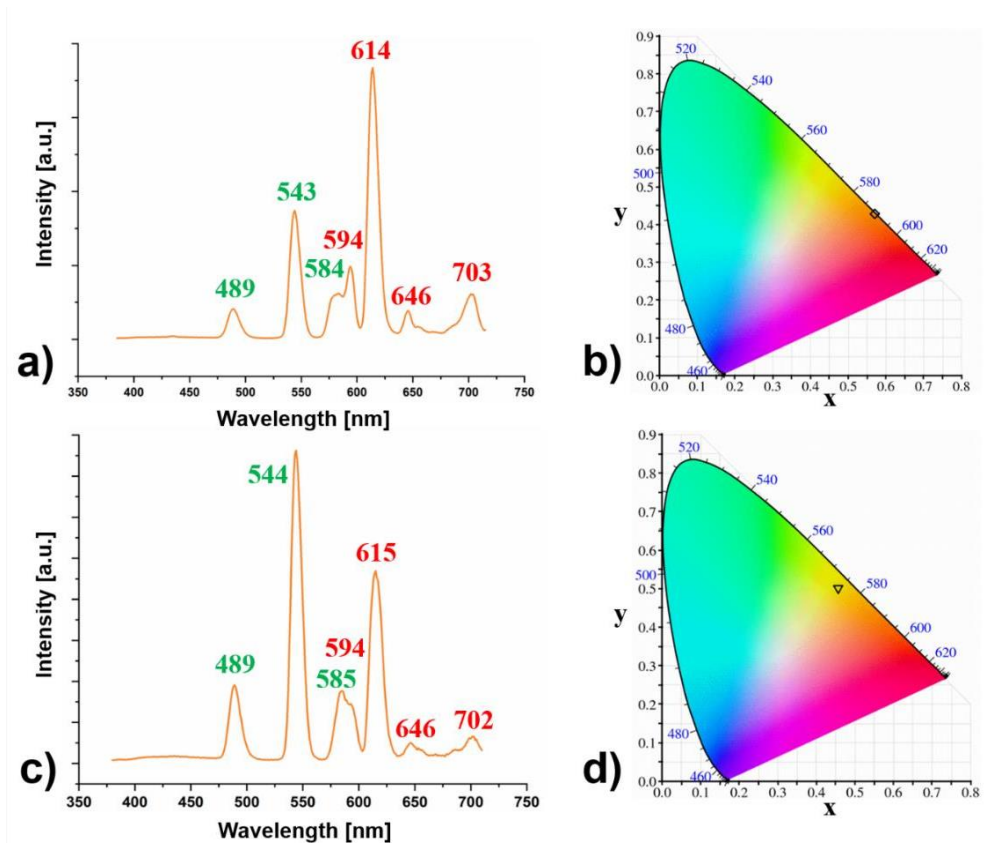

Figure S5: a) Luminescence spectrum of Eu-β-Si<sub>3</sub>N<sub>4</sub> and Tb-β-Si<sub>3</sub>N<sub>4</sub> powders mixed in a mortar, b) CIE diagram of Eu-Si<sub>3</sub>N<sub>4</sub> and Tb-Si<sub>3</sub>N<sub>4</sub> powders mixed in a mortar, c) Luminescence spectrum of Eu-β-Ge<sub>3</sub>N<sub>4</sub> and Tb-β-Ge<sub>3</sub>N<sub>4</sub> powders mixed in a mortar, d) CIE diagram of Eu-β-Ge<sub>3</sub>N<sub>4</sub> and Tb-β-Ge<sub>3</sub>N<sub>4</sub> powders mixed in a mortar.

### Comparison with literature

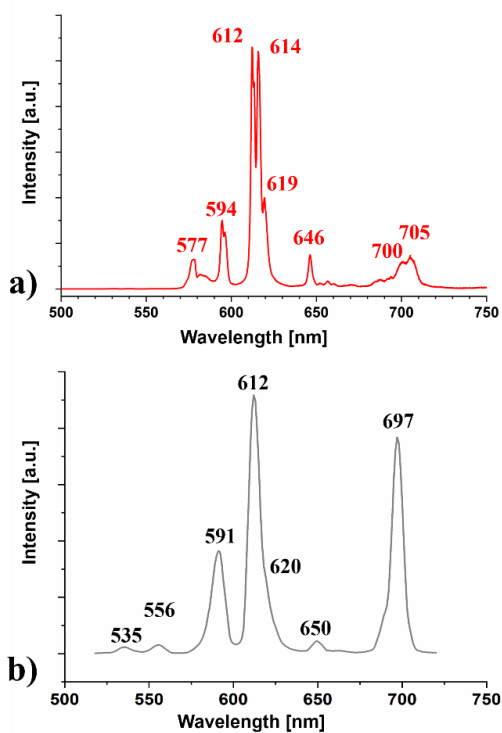

Figure S6: Luminescence spectra of a) Eu-β-Si<sub>3</sub>N<sub>4</sub> and b) EuCl<sub>3</sub> · 6 H<sub>2</sub>O.

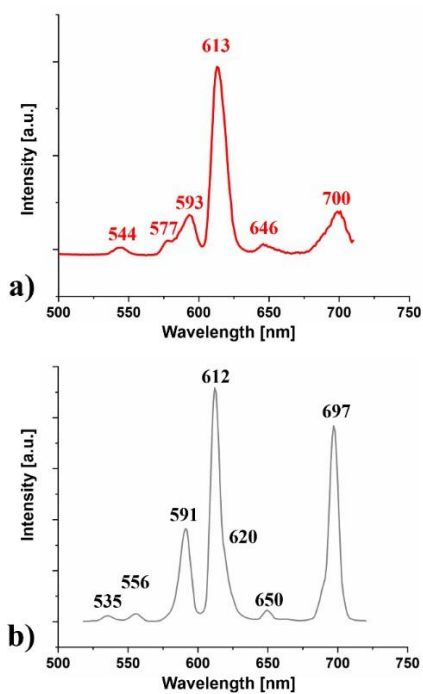

Figure S7: Luminescence spectra of a) Eu-β-Ge<sub>3</sub>N<sub>4</sub> and b) EuCl<sub>3</sub> · 6 H<sub>2</sub>O.

The works of Li *et al.*<sup>1</sup> deal with the photoluminescence properties of rare-earth doped nanocrystalline  $\alpha$ -Si<sub>3</sub>N<sub>4</sub>. Here we use the expression doping explicitly as this is the title of the work of Li *et al.*<sup>1</sup> The doping has been done with Eu- and Tb-oxide and the authors confirm the oxygen content playing an important role. Furthermore, the content of the lanthanoids must not exceed 0.5 mol%, because otherwise  $\alpha$ -Si<sub>3</sub>N<sub>4</sub> was no longer stable. They describe the Eu<sup>2+</sup>-doped  $\alpha$ -Si<sub>3</sub>N<sub>4</sub> to show a blue band emission peak at around 460 and 470 nm which is completely different to the red luminescence of Eu<sup>3+</sup> known from literature<sup>2-4</sup> When using EuN as a dopant the luminescence intensity decreases significantly. (see Figure S7) Regarding the doping of  $\alpha$ -Si<sub>3</sub>N<sub>4</sub> with Tb<sub>4</sub>O<sub>7</sub> the result was declared as Tb<sub>0.005</sub>Si<sub>2.985</sub>N<sub>3.964</sub>O<sub>0.00875</sub>.<sup>1</sup> (See Figure S12)

Li *et al.*<sup>5</sup> describe a Eu-doped yellow phosphor consisting of a mixed phase of nanocrystalline  $\alpha$ -Si<sub>3</sub>N<sub>4</sub> and  $\beta$ -Si<sub>3</sub>N<sub>4</sub>. It was realized by reacting solid polycarbosilane with europium acetylacetonate hydrate and followed by nitridation and calcination of the precursor. The broad band luminescence peak is around 550 nm, resulting in a yellow greenish colour. The authors confirmed an oxygen as well as a carbon content resulting in the formation of nonstoichiometric Si<sub>3</sub>N<sub>4</sub>. (see Figure S8)

Yin *et al.*<sup>6</sup> synthesized very thin and wide single-crystal  $\alpha$ -Si<sub>3</sub>N<sub>4</sub> nanobelts by a vapor-solid thermal reaction featuring a very broad band emission spectrum 420-750 nm with a maximum at 575 nm. But here no doping with rare-earth ions is reported.

Su *et al.*<sup>7</sup> prepared ultra-long, single crystal, Eu-doped  $\alpha$ -Si<sub>3</sub>N<sub>4</sub> nanowires by nitriding Eu-doped cryomilled nanocrystalline Si powder resulting in a very broad band green emission around 570 nm. (see Figure S9)

Xu *et al.*<sup>8</sup> introduced Eu<sup>2+</sup>-doped  $\alpha$ -Si<sub>3</sub>N<sub>4</sub> nanowires coated with a thin BN film. (see Figure S10) The relationship between photoluminescence and intrinsic point defects in  $\alpha$ -Si<sub>3</sub>N<sub>4</sub> via band structure modelling based on density functional theory calculations is interpreted by Huang *et al.*<sup>9</sup> Huang *et al.*<sup>10</sup> present formation energies, electronic and optical properties of Y-doped Si<sub>3</sub>N<sub>4</sub> on the basis of DFT calculations. Huang and coworkers<sup>11</sup> report the photoluminescence behavior of ultra-pure  $\alpha$ -Ge<sub>3</sub>N<sub>4</sub> nanowires resulting in a blue-green luminescence (440 nm) from the electronic transition from the conduction band to valence band. Huang *et al.*<sup>12</sup> report the doping of single-crystalline  $\alpha$ -Si<sub>3</sub>N<sub>4</sub> nanowires (Y, Ce, Tb) via directly nitriding-doped nanocrystalline silicon powders. A comparison of the luminescence spectra of these one-dimensional nanomaterials with doped bulk material Tb- $\beta$ -Si<sub>3</sub>N<sub>4</sub> (see Figure S13) indicates clear differences. Also the doping of  $\alpha$ -Si<sub>3</sub>N<sub>4</sub>:Eu displays a completely divers broad band luminescence peak around 578 nm. (see Figure S11)

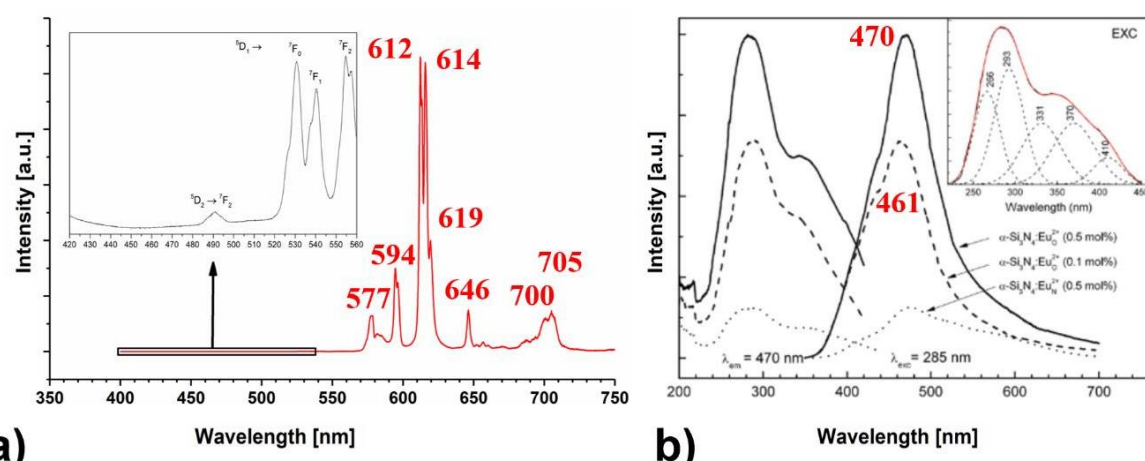

Figure S8: Luminescence spectra of a)  $\text{Eu-}\beta\text{-Si}_3\text{N}_4$  and b)  $\alpha\text{-Si}_3\text{N}_4\text{:Eu}^1$  (Wavelengths are estimated from the scale in *ref.*<sup>1</sup>)

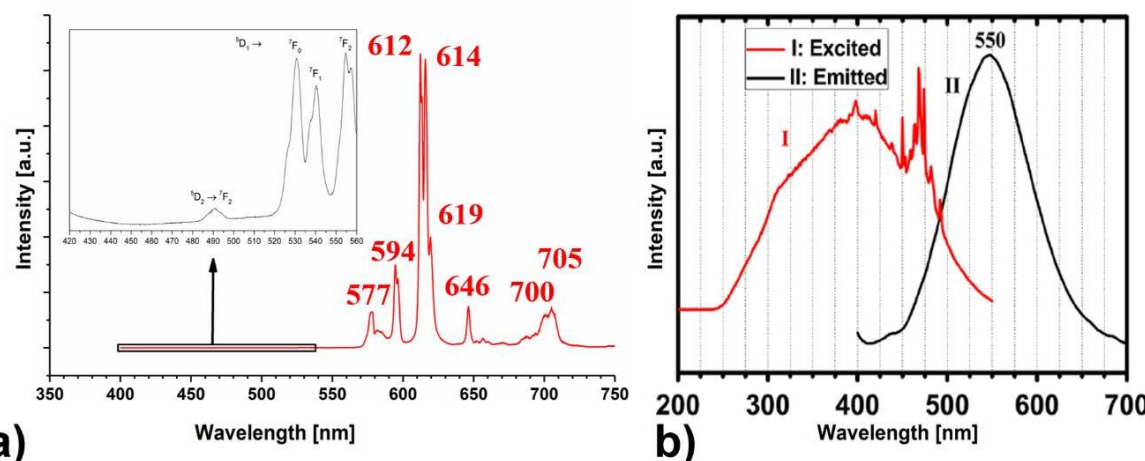

Figure S9: Luminescence spectra of a)  $\text{Eu-}\beta\text{-Si}_3\text{N}_4$  and b)  $\alpha\text{-Si}_3\text{N}_4\text{:Eu}^5$  (Wavelengths are estimated from the scale in *ref.*<sup>5</sup>)

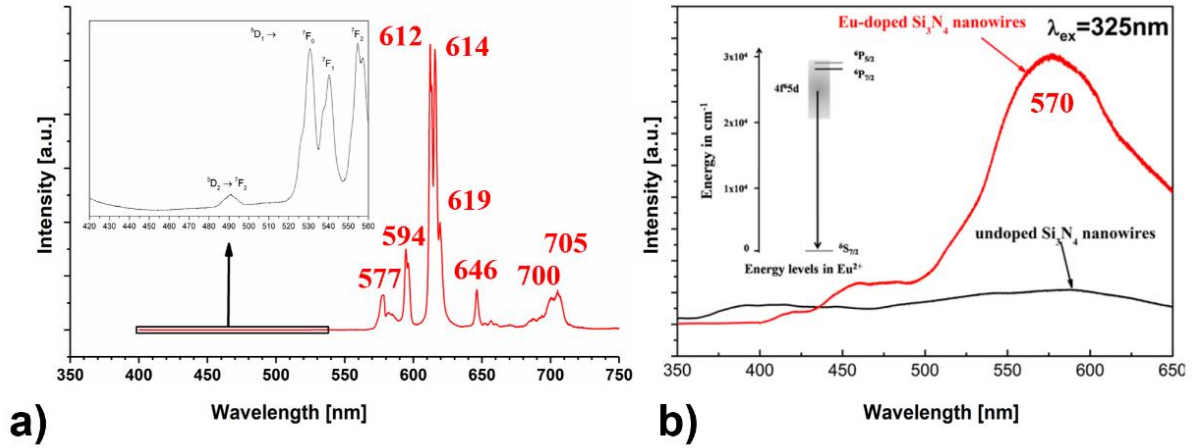

Figure S10: Luminescence spectra of a) Eu-β-Si<sub>3</sub>N<sub>4</sub> and b) α-Si<sub>3</sub>N<sub>4</sub>:Eu.<sup>7</sup> (Wavelengths are estimated from the scale in *ref.*<sup>7</sup>)

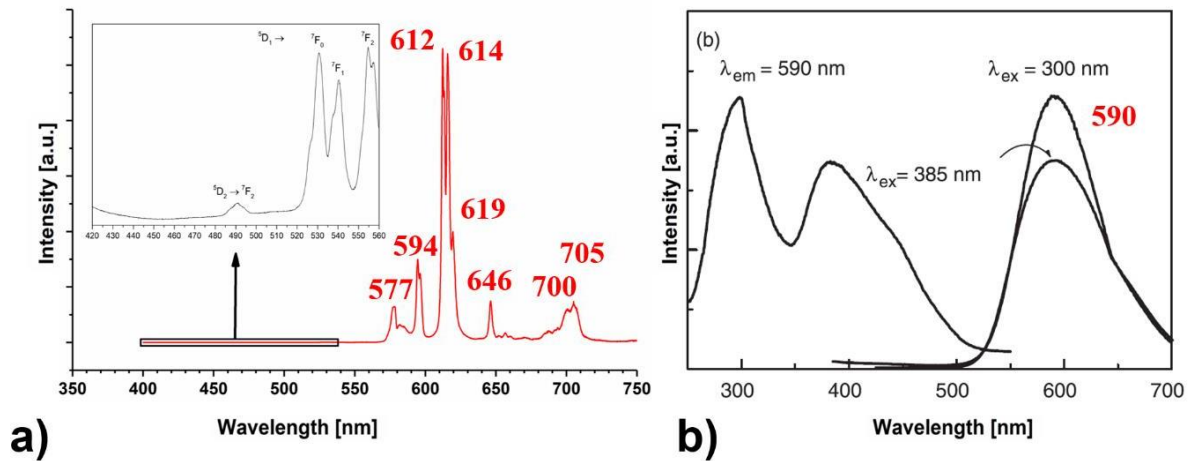

Figure S11: Luminescence spectra of a) Eu-β-Si<sub>3</sub>N<sub>4</sub> and b) α-Si<sub>3</sub>N<sub>4</sub>:Eu nanowires coated with a thin BN film.<sup>8</sup> (Wavelengths are estimated from the scale in *ref.*<sup>8</sup>)



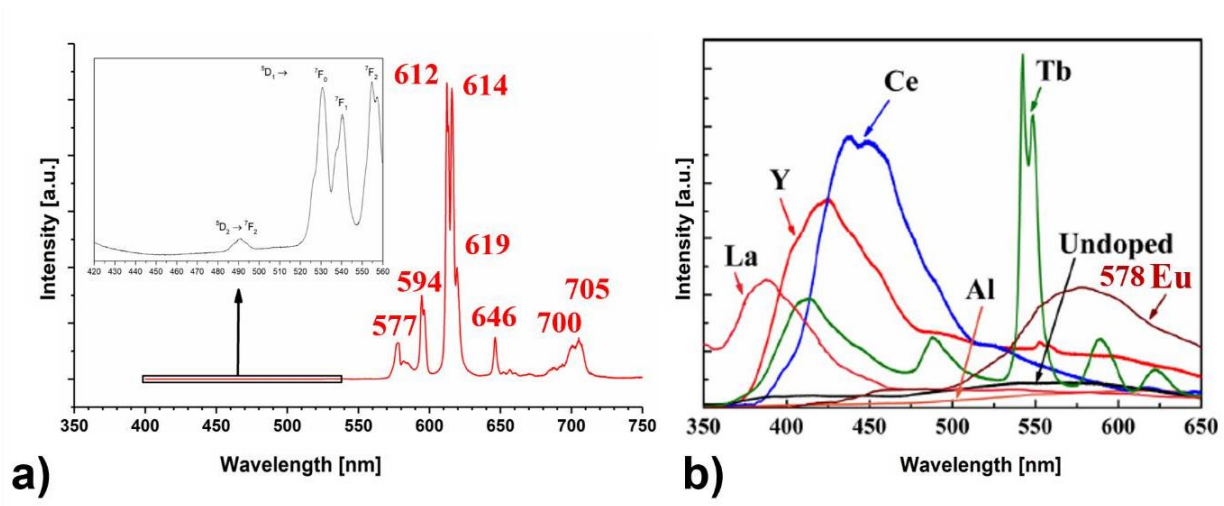

Figure S12: Luminescence spectra of a) Eu-β-Si<sub>3</sub>N<sub>4</sub> and b) α-Si<sub>3</sub>N<sub>4</sub>:Eu nanowires.<sup>12</sup>  
 (Wavelengths are estimated from the scale in *ref.*<sup>12</sup>)

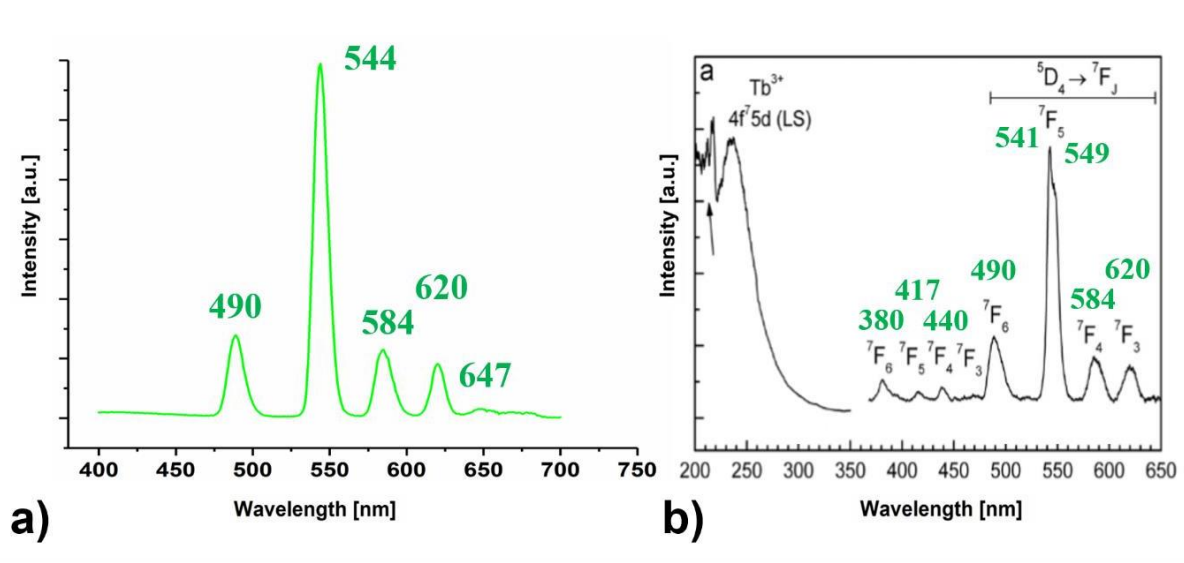

Figure S13: Luminescence spectra of a) Tb-β-Si<sub>3</sub>N<sub>4</sub> and b) α-Si<sub>3</sub>N<sub>4</sub>:Tb<sup>1</sup> (Wavelengths are estimated from the scale in *ref.*<sup>1</sup>)

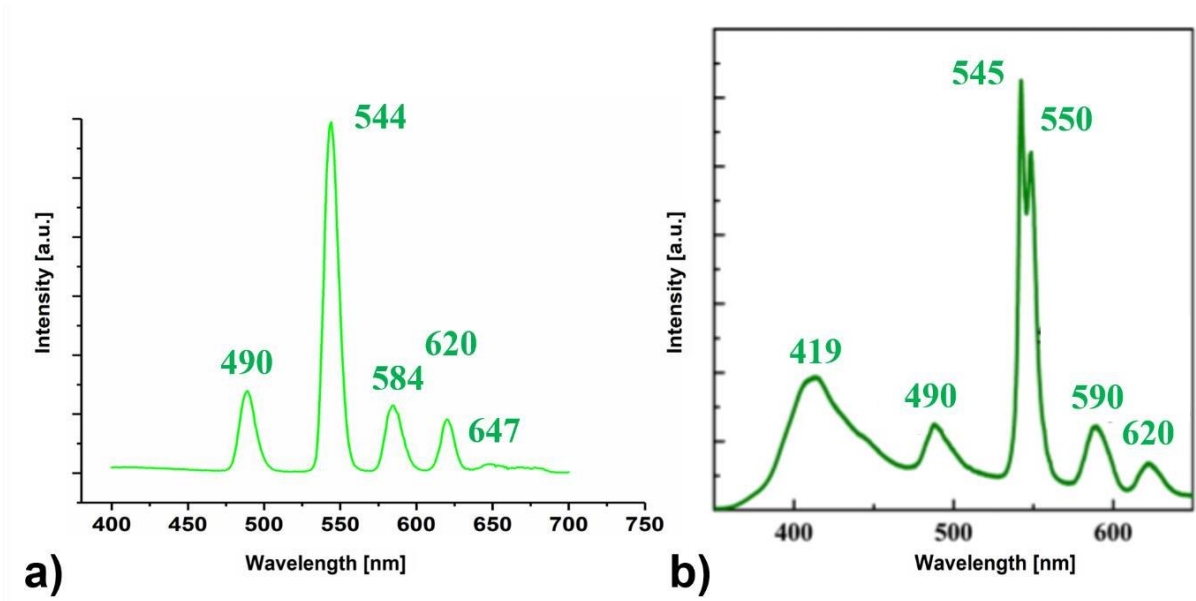

Figure S14: Luminescence spectra of a)  $\text{Si}_3\text{N}_4:\text{Tb}$  and b)  $\text{Si}_3\text{N}_4:\text{Tb}$  Nanowires<sup>12</sup> (Wavelengths are estimated from the scale in *ref.*<sup>12</sup>)

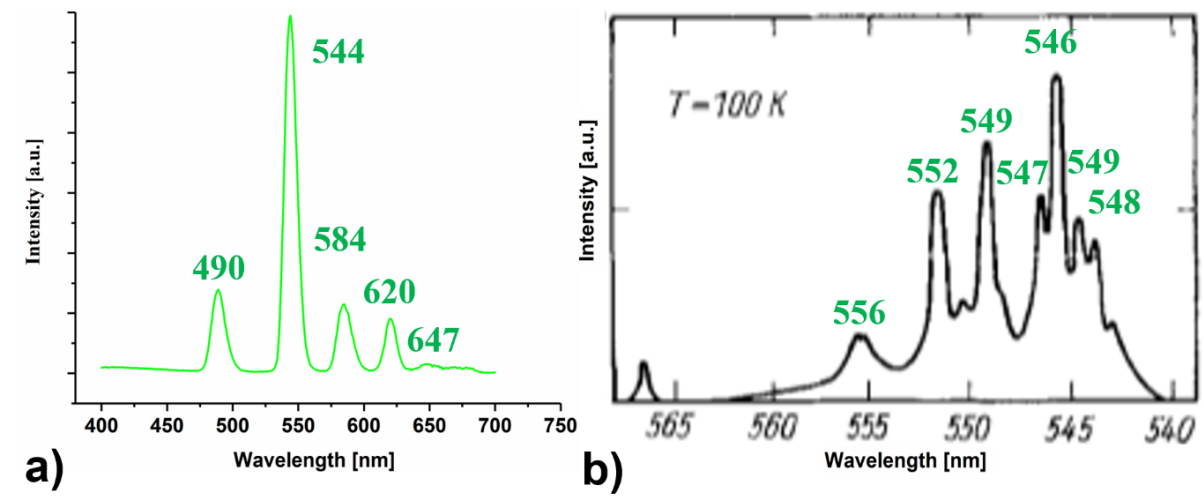

Figure S15: Luminescence spectra of a)  $\text{Si}_3\text{N}_4:\text{Tb}$  and b)  $\text{TbOCl}$ .<sup>13</sup> (Wavelengths are estimated from the scale in *ref.*<sup>13</sup>)

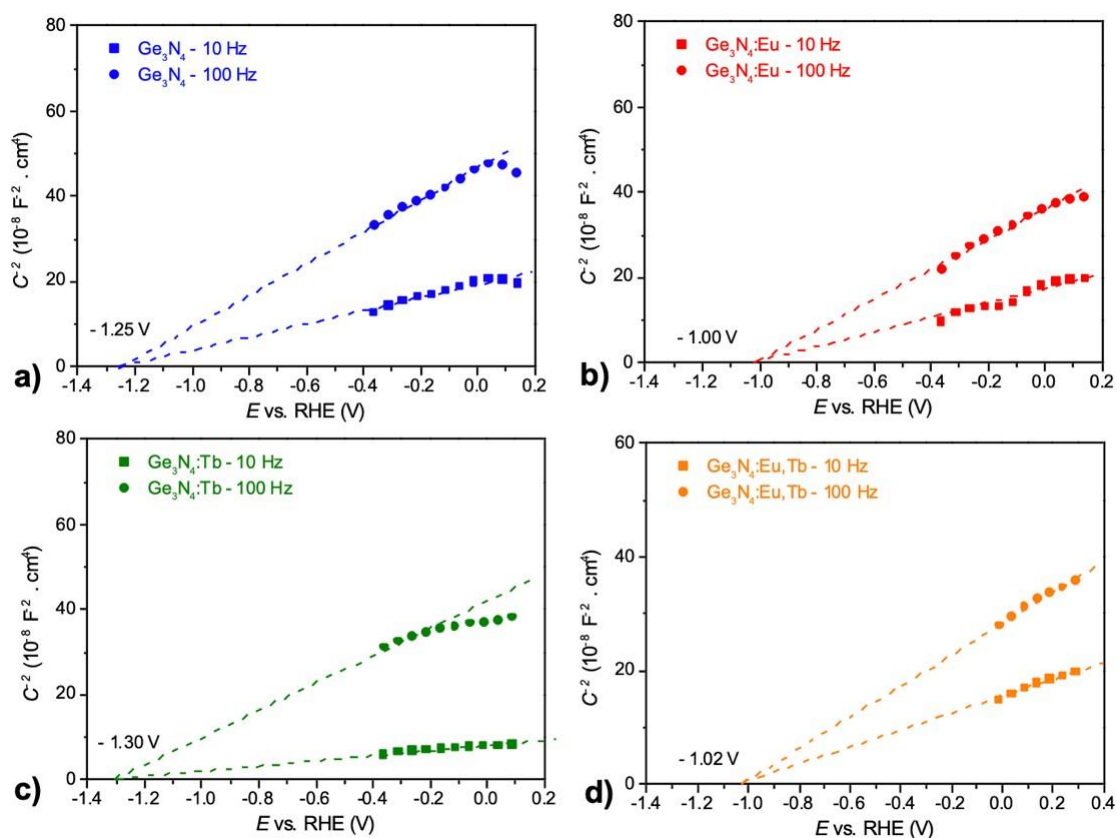

Figure S16: Mott-Schottky (MS) analysis of EIS measurements at an applied frequency of 10, 100 and 1000 Hz of a) pure  $\text{Ge}_3\text{N}_4$  (blue), b) Tb- $\text{Ge}_3\text{N}_4$  (green), c) Eu- $\text{Ge}_3\text{N}_4$  (red) and d) Eu,Tb- $\text{Ge}_3\text{N}_4$ : $\text{Eu}^{3+}$ , $\text{Tb}^{3+}$  (orange). Measurements were performed in a 0.1 M potassium phosphate electrolyte in pH 7.

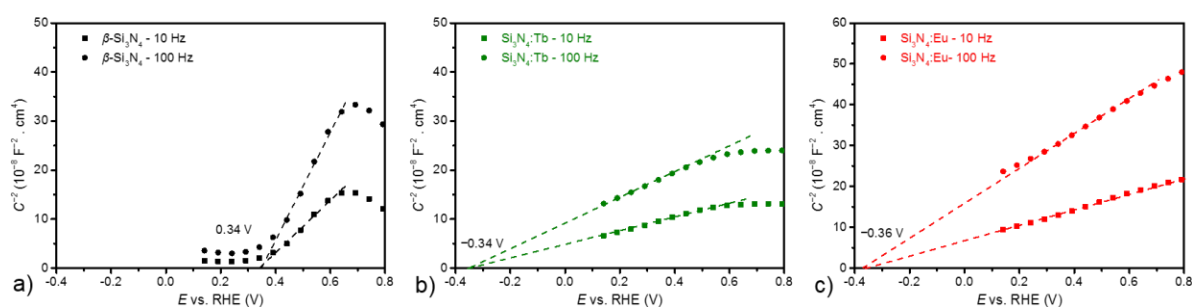

Figure S17: Mott-Schottky analysis of EIS measurements at an applied frequency of 10, and 100 Hz of a) undoped  $\text{Si}_3\text{N}_4$  (black), b) Tb- $\text{Si}_3\text{N}_4$  (green) and c) Eu- $\text{Si}_3\text{N}_4$  (red). Measurements were performed in a 0.1 M potassium phosphate electrolyte in pH 7.

### ***DFT calculations***

Calculations were carried out on pure and adsorbed  $\beta$ -Si<sub>3</sub>N<sub>4</sub> and  $\beta$ -Ge<sub>3</sub>N<sub>4</sub> within the Density Functional Theory (DFT) as implemented in the Vienna *ab initio* Simulation Package (VASP).<sup>14–16</sup> For electron exchange and correlation we used the Generalized Gradient approximation as parameterized by Perdew, Becke, and Ernzerhof (PBE) functional.<sup>17</sup> Atom cores are described through the projector augmented wave (PAW) method.<sup>18</sup> The kinetic energy cutoff for plane wave expansions was set to 500 eV, and the Brillouin zone was sampled by Monkhorst–Pack meshes.<sup>19</sup> Atomic positions were optimized until forces were converged to lower than  $3 \cdot 10^{-2}$  eV/Å. DOS were shifted so that the Fermi level lies at 0 eV. For the geometry optimization the 4*f* states of the rare earths were placed in the pseudopotential, allowing to fix the oxidation degree to 3+ and to estimate the relative stabilities of both Eu<sup>3+</sup> and Tb<sup>3+</sup> in sites A and B. The calculations of the densities of states and magnetic properties was done by considering explicitly the 4*f* orbitals of the rare-earths in the valence states. Such an explicit treatment required to use GGA+U method<sup>20</sup> with a Hubbard term  $U_{\text{eff}} = U - J = 6$  eV for the 4*f* (*RE*) states and to include the spin-orbit coupling (SOC).

### ***References***

- 1 Y. Q. Li, N. Hirosaki, R. J. Xie, T. Takeda and M. Mitomo, *J. Lumin.*, 2010, **130**, 1147–1153.
- 2 M. Peres, K. Lorenz, E. Alves, E. Nogales, B. Méndez, X. Biquard, B. Daudin, E. G. Villora and K. Shimamura, *J. Phys. D. Appl. Phys.*, 2017, **50**, 325101.
- 3 H. J. Lozykowski, W. M. Jadwisieniczak, J. Han and I. G. Brown, *Appl. Phys. Lett.*, 2000, **77**, 767–769.
- 4 A. Nishikawa, T. Kawasaki, N. Furukawa, Y. Terai and Y. Fujiwara, *Appl. Phys. Express*, 2009, **2**, 071004.
- 5 Q. Li, C. Gong, X. Cheng and Y. Zhang, *Ceram. Int.*, 2015, **41**, 4227–4230.
- 6 L.-W. Yin, Y. Bando, Y.-C. Zhu and Y.-B. Li, *Appl. Phys. Lett.*, 2003, **83**, 3584–3586.
- 7 R. Su, Z. F. Huang, F. Chen, Q. Shen and L. M. Zhang, in *Key Engineering Materials*, Trans Tech Publications Ltd, 2017, vol. 727, pp. 635–641.
- 8 X. Xu, T. Nishimura, Q. Huang, R.-J. Xie, N. Hirosaki and H. Tanaka, *J. Am. Ceram. Soc.*, 2007, **90**, 4047–4049.
- 9 Z. Huang, F. Chen, Q. Shen and L. Zhang, *RSC Adv.*, 2016, **6**, 7568–7574.
- 10 Z. Huang, F. Chen, R. Su, Z. Wang, J. Li, Q. Shen and L. Zhang, *J. Alloys Compd.*, 2015, **637**, 376–381.

- 11 Z. Huang, R. Su, H. Yuan, J. Zhang, F. Chen, Q. Shen and L. Zhang, *Ceram. Int.*, 2018, **44**, 10858–10862.
- 12 Z. Huang, Z. Wang, H. Yuan, J. Zhang, F. Chen, Q. Shen and L. Zhang, *J. Mater. Sci.*, 2018, **53**, 13573–13583.
- 13 P. A. M. Berdowski, J. van Herk, L. Jansen and G. Blasse, *Phys. status solidi*, 1984, **125**, 387–391.
- 14 G. Kresse and J. Furthmüller, *Comput. Mater. Sci.*, 1996, **6**, 15–50.
- 15 G. Kresse and J. Hafner, *Phys. Rev. B*, 1994, **49**, 14251–14269.
- 16 G. Kresse and J. Furthmüller, *Phys. Rev. B*, 1996, **54**, 11169–11186.
- 17 J. P. Perdew, K. Burke and M. Ernzerhof, *Phys. Rev. Lett.*, 1997, **78**, 1396–1396.
- 18 P. E. Blöchl, *Phys. Rev. B*, 1994, **50**, 17953–17979.
- 19 H. J. Monkhorst and J. D. Pack, *Phys. Rev. B*, 1976, **13**, 5188–5192.
- 20 S. Dudarev and G. Botton, *Phys. Rev. B - Condens. Matter Mater. Phys.*, 1998, **57**, 1505–1509.
